# Supplementary material
Source: PubMed Central journal article supplement (PMC166367)

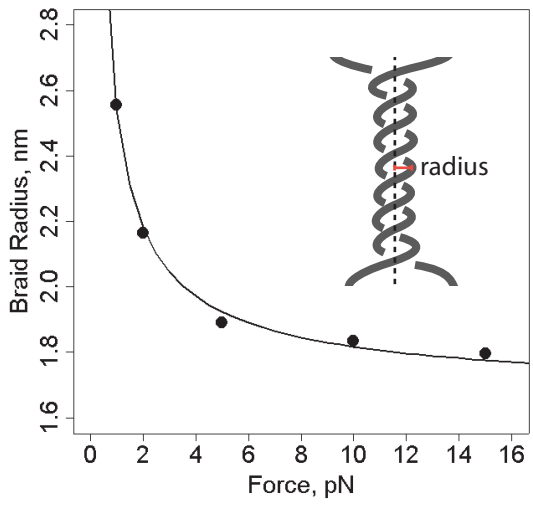

Supplement: pnas_1133178100_2.pdf [file pnas_1133178100_2.pdf]

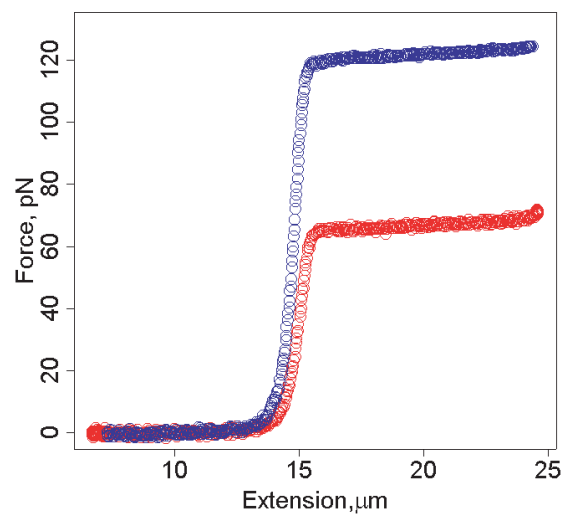

Supplement: pnas_1133178100_4.pdf [file pnas_1133178100_4.pdf]

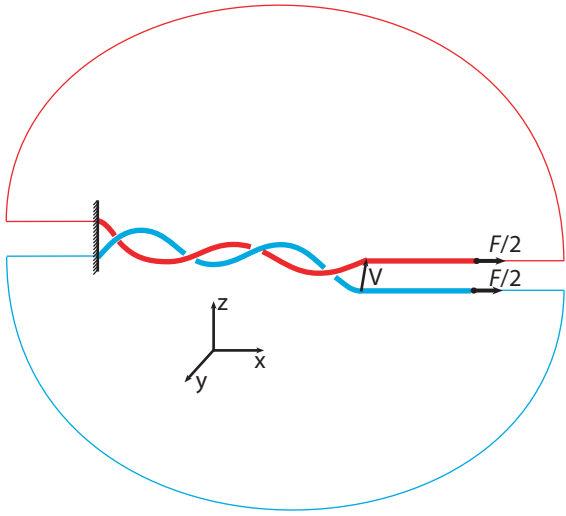

Supplement: pnas_1133178100_6.pdf [file pnas_1133178100_6.pdf]
